# Supplementary material
Source: PubMed Central journal article supplement (PMC2613625)

Supplemental Table 1. Observed and predicted masses of 2006 interacting peptides analyzed using MS. MC corresponds to number of missed cleavages by trypsin.

| <b>Observed<br/>Mass</b> | <b>Predicted<br/>Mass</b> | <b>Position</b> | <b>#MC</b> | <b>Sequence</b>          |
|--------------------------|---------------------------|-----------------|------------|--------------------------|
| 1390.55                  | 1390.74                   | 245-256         | 0          | NYQLELALPAMK             |
| 2538.87                  | 2538.40                   | 271-292         | 3          | TFVSLICEHHLKKFPQGQK GK   |
| 1809.69                  | 1809.95                   | 293-307         | 0          | VVFFANQIPVYEQQK          |
| 1162.43                  | 1162.59                   | 308-316         | 1          | SVFSKYFER                |
| 2179.89                  | 2180.19                   | 395-418         | 0          | LGGSSGPLPQVIGLTASVGV GDA |
| 1390.55                  | 1390.76                   | 430-443         | 0          | LCASLDASVIATVK           |
| 1853.72                  | 1853.98                   | 444-458         | 0          | HNLEEEQVVKPQK            |
| 2325.82                  | 2325.31                   | 462-480         | 4          | KVESRISDKFKYIIAQLMR      |
| 1725.74                  | 1725.97                   | 467-480         | 2          | ISDKFKYIIAQLMR           |
| 2470.01                  | 2470.34                   | 467-487         | 3          | ISDKFKYIIAQLMRDTESLA K   |
| 1007.43                  | 1007.57                   | 473-480         | 0          | YIIAQLMR                 |
| 2252.79                  | 2252.23                   | 473-491         | 3          | YIIAQLMRDTESLAKRICK      |
| 1329.50                  | 1329.68                   | 492-502         | 0          | DLENLSQIQNR              |
| 1983.74                  | 1984.02                   | 503-518         | 1          | EFGTQKYEQWIVTVQK         |
| 1220.51                  | 1220.68                   | 537-546         | 0          | ALFLYTSHLR               |
| 1348.58                  | 1348.77                   | 537-547         | 1          | ALFLYTSHLRK              |
| 1961.71                  | 1961.98                   | 560-575         | 2          | MKDALDYLKDDFFSNVR        |
| 1592.54                  | 1592.76                   | 576-589         | 0          | AAGFDEIEQDLTQR           |
| 2125.72                  | 2126.00                   | 576-593         | 1          | AAGFDEIEQDLTQRFEEL       |
| 1060.41                  | 1060.56                   | 594-602         | 0          | LQELESVSR                |
| 1924.60                  | 1925.06                   | 636-652         | 2          | TRALVDALKNWIEGNPK        |
| 1301.61                  | 1301.79                   | 653-664         | 0          | LSFLKPGILTGR             |
| 1486.65                  | 1486.91                   | 653-666         | 1          | LSFLKPGILTGRGK           |
| 1301.61                  | 1301.73                   | 724-734         | 3          | MIQTRGRGRAR              |
| 1264.45                  | 1264.63                   | 768-777         | 0          | LQTWDEAVFR               |
| 2621.02                  | 2621.38                   | 768-788         | 2          | LQTWDEAVFREKILHIQTHE K   |
| 1118.47                  | 1118.63                   | 780-788         | 0          | ILHIQTHEK                |
| 1028.38                  | 1028.52                   | 852-859         | 1          | QFSSFELR                 |
| 947.47                   | 946.56                    | 881-888         | 0          | TFEIPVIK                 |
| 2252.79                  | 2252.08                   | 908-925         | 2          | WKDFHFELKIPFDPAEMSK      |

sFig. 1. Sequence and predicted secondary structures of RNAs used for RIG-I assay. 3-css27 is a 27-nt RNA with three 5' phosphates and annealing two strands of 27 bases generated dsR27. Ccss27 is predicted by mfold to have minimally stable secondary structure. The sequence of HCV sgR and pIC are not shown. HCV sgR is an in vitro transcribed 9 kb long HCV subgenomic replicon RNA, pIC is poly(I:C) of heterogeneous length, pIC115 and pIC25 is poly(I:C) of 11-5 and 25-bp, respectively.

sFig. 2. Gel filtration profiles of the monomers and dimers of R-HR in complex with dsRNA of 24-bp. The black line represents the elution profile of R-HR while the grey line represents a sample with a 2:1 molar mix of R-HR with the ligand.

sFig. 3. Sample spreads for the particles used in the single particle reconstructions of R-HR, R-HR dimer with dsRNA, and R-HR dimer with 2006. Class averages and Fourier shell correlation for each set are shown at the bottom.

sFig. 4. Dimensions of the monomers of R-HR and the dimers with dsRNA of 24-bp and 2006. The rods indicate the dimension for which the measurements were made.

Supplemental Fig. 1

**3P-css27:** PPP-GGUGCAGAUGAACUUCAGGGUCAGCUU

**css27:** GGUGCAGAUGAACUUCAGGGUCAGCUU

**dsR27:** AAGCUGACCCUGAAGUUCAUCUGCACC  
UUCGACUGGGACUUCAAGUAGACGUGG

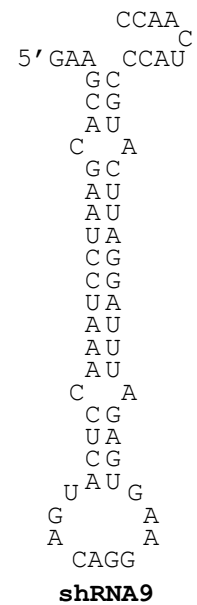

Supplemental Fig. 2

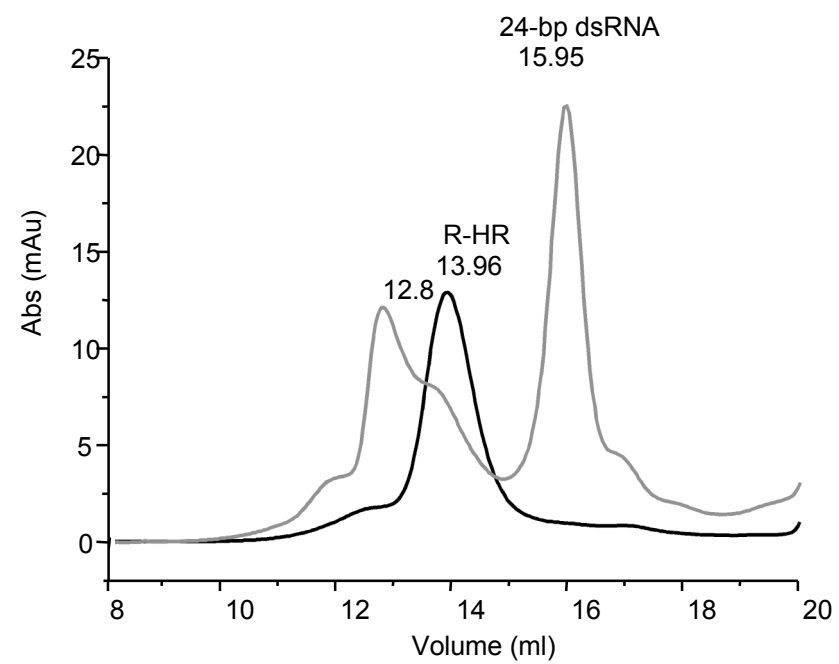

Supplemental Fig. 3

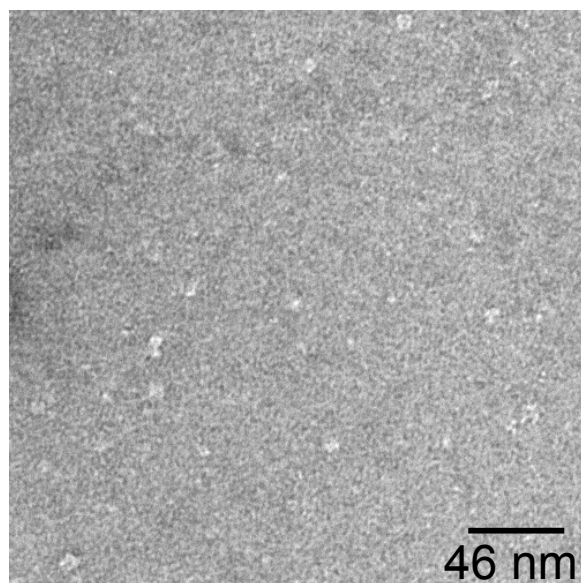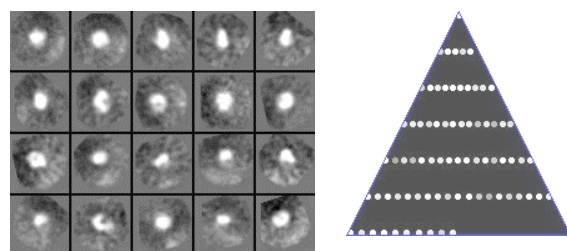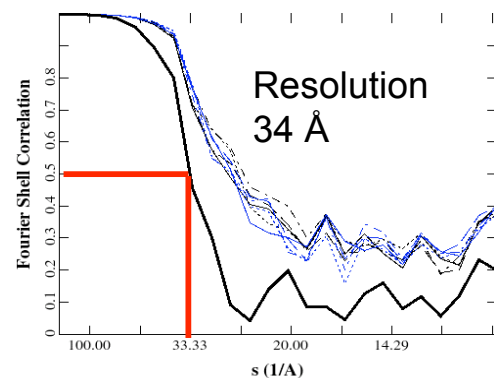

R-HR reconstruction

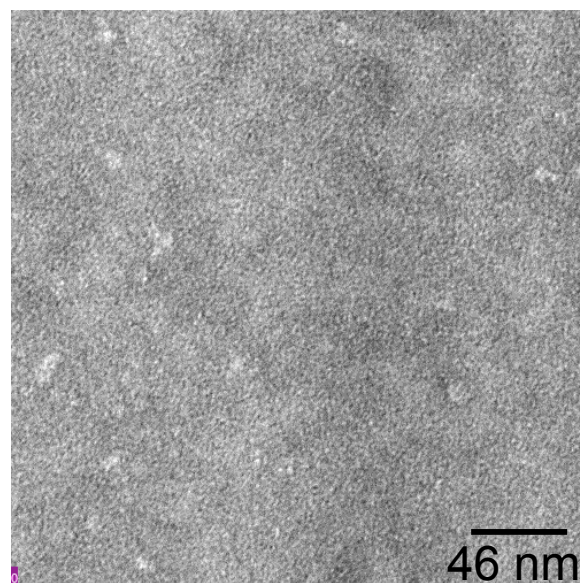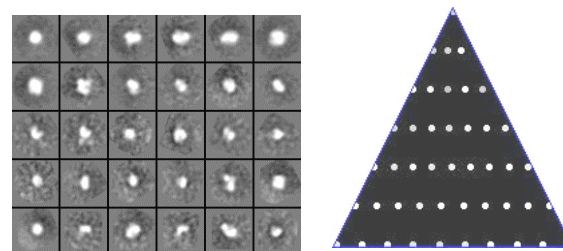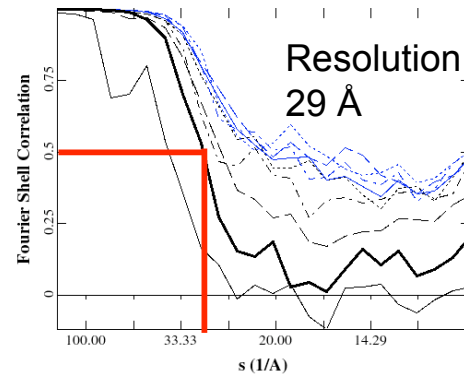

R-HR dimer complexed with a  
24-bp dsRNA

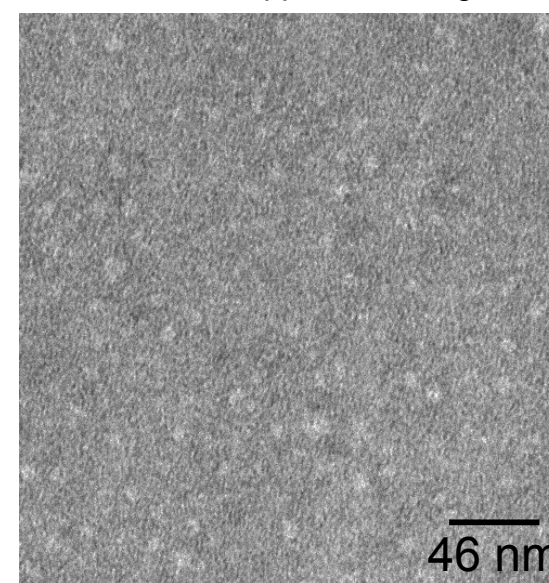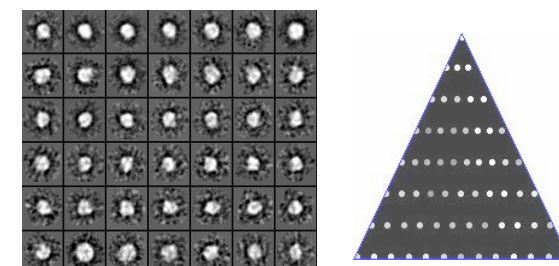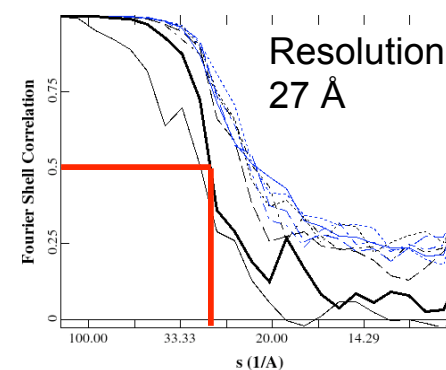

R-HR dimer complex with  
2006

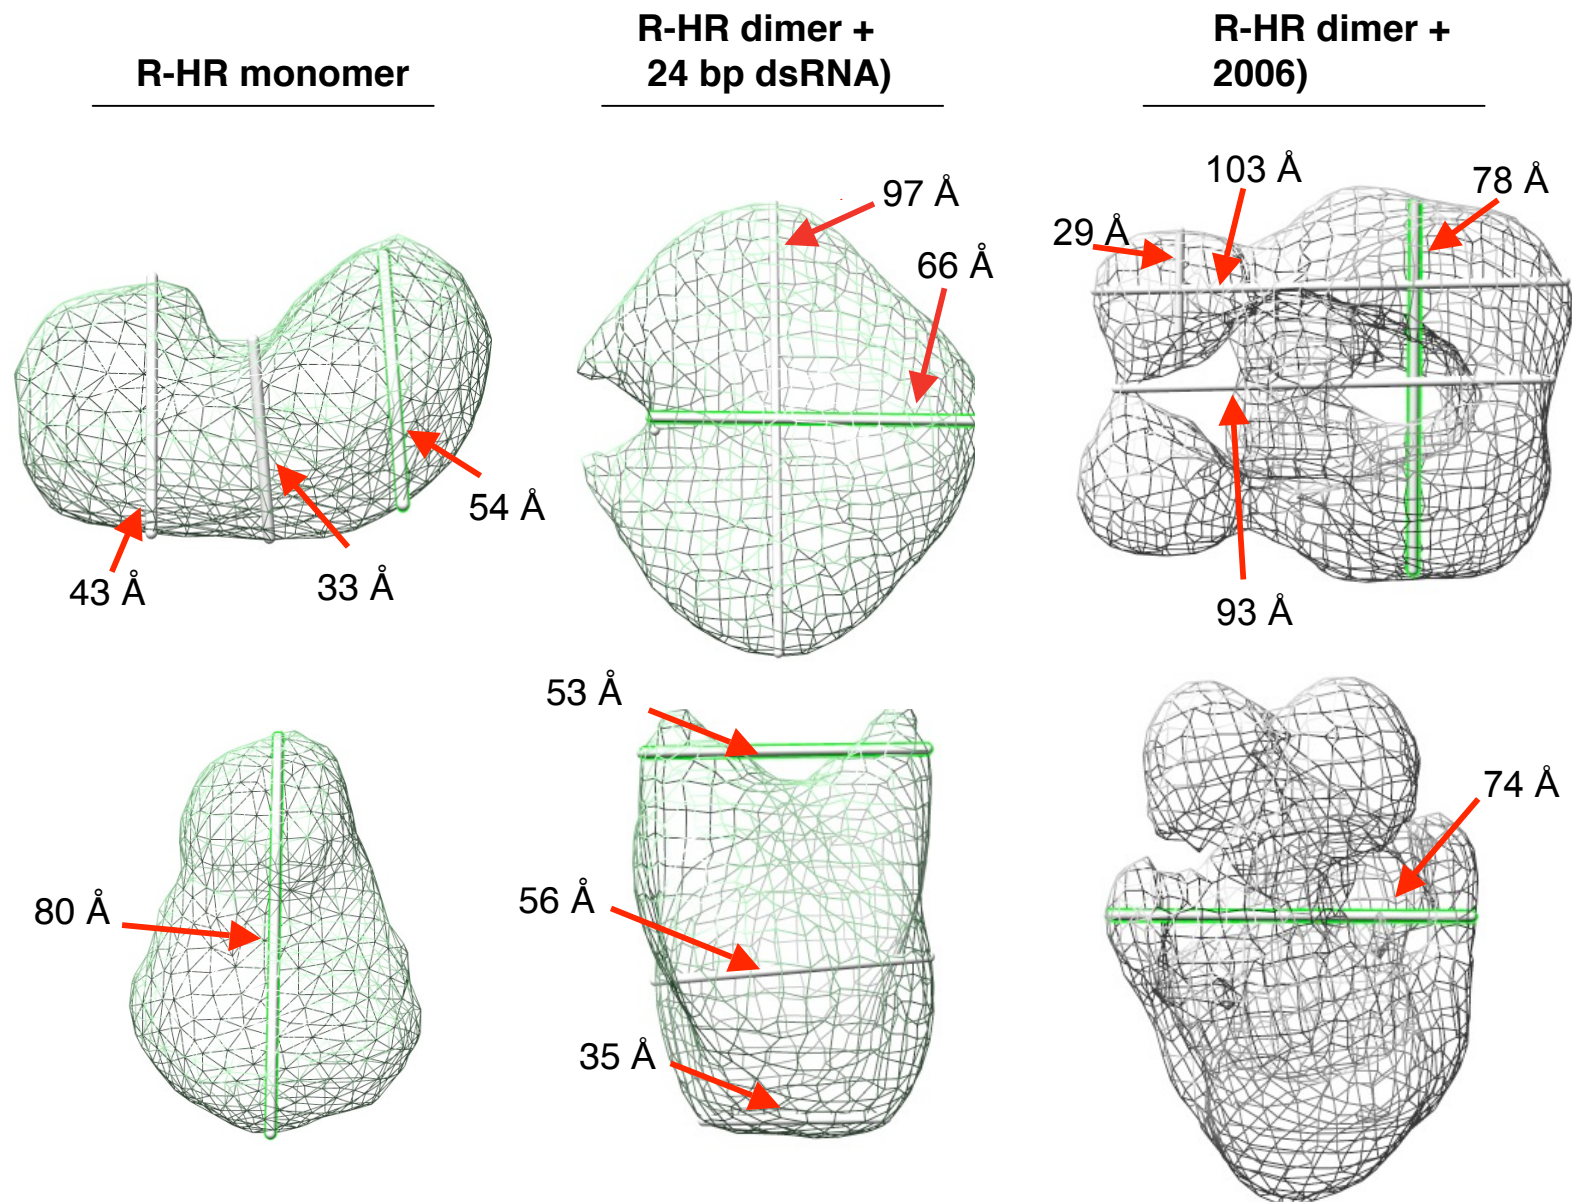

Supplement: M806219200_1.pdf [file M806219200_1.pdf]
